# Supplementary material for: Microorganism inspired hydrogels: hierarchical super/macro-porous structure, rapid swelling rate and high adsorption
Source: Royal Society of Chemistry journal article supplement (doi:10.1039/c4ra04243c), 2014-01-01
Supplement: c4ra04243c1.pdf [file c4ra04243c1.pdf]

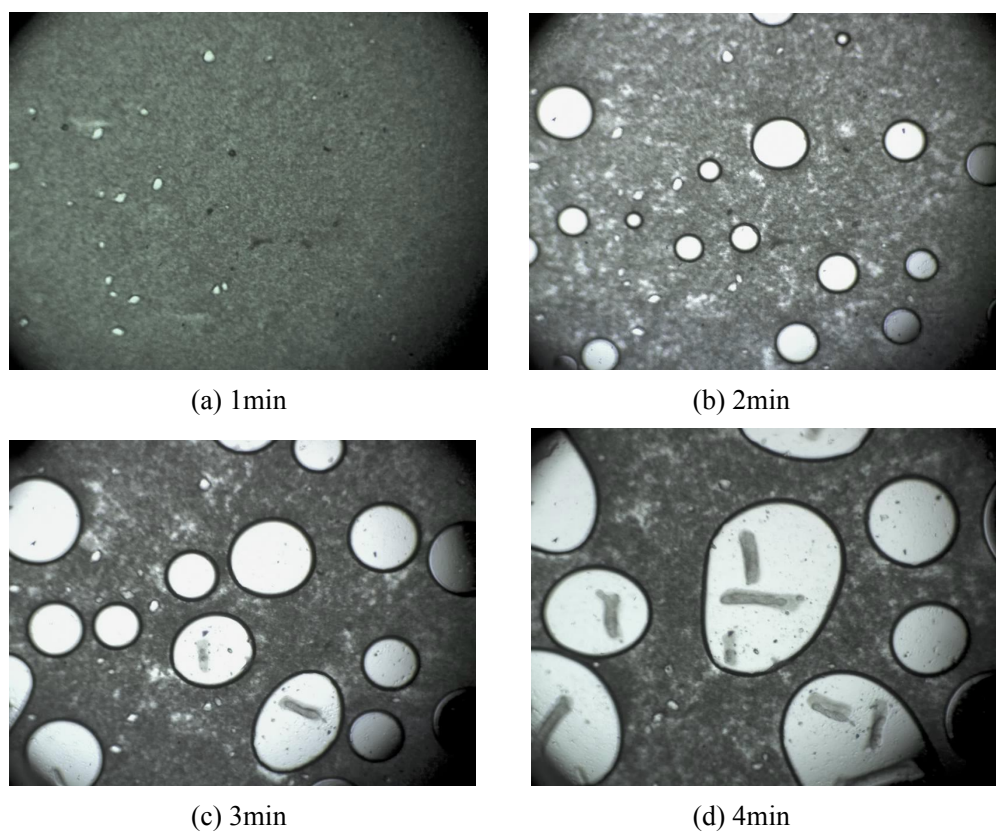

Figure S1 Optical photos of foams in fermentation process between yeast and nutrition as a function of time

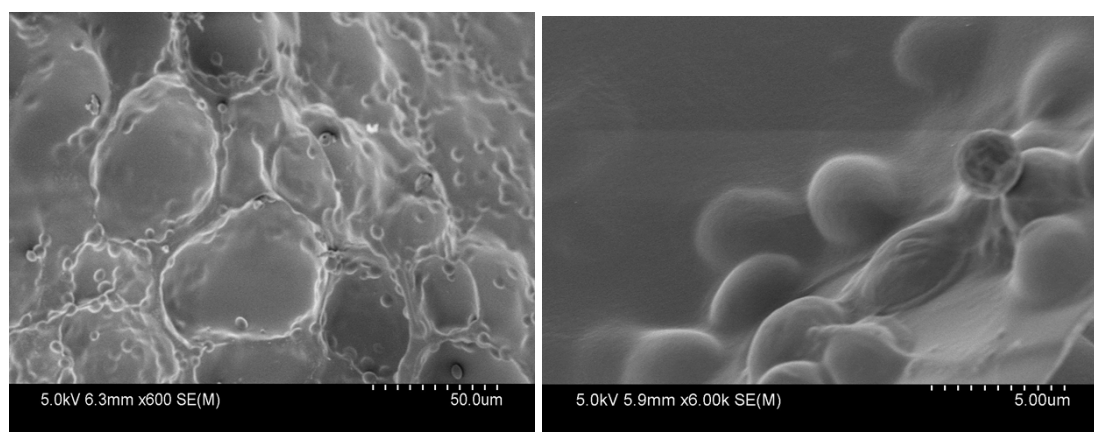

Figure S2 Yeast cells inside of the porous hydrogels
